# Supplementary material for: Green simultaneous quantification of levodopa, carbidopa, and benserazide in anti-Parkinson's tablets by ATR-FTIR spectroscopy combined with hurdle modelling and machine learning
Source: Royal Society of Chemistry journal article supplement (doi:10.1039/d6ra02243j), 2026-05-18
Supplement: d6ra02243j3.pdf [file d6ra02243j3.pdf]

## **Green simultaneous quantification of levodopa, carbidopa, and benserazide in anti-Parkinson tablets by ATR-FTIR spectroscopy combined with hurdle modelling and machine learning**

Manh Huy Nguyen<sup>a,b</sup>, Thanh Dam Nguyen<sup>a,b</sup>, Hong Anh Duong<sup>a,b</sup>, Hung Viet Pham<sup>\*b</sup>

- <sup>a</sup>. Key Laboratory of Analytical Technology for Environmental Quality and Food Safety Control (KLATEFOS), VNU University of Science, Vietnam National University, Hanoi, 334 Nguyen Trai, Thanh Xuan, Hanoi 100000, Vietnam
- <sup>b</sup>. Research Centre for Environmental Technology and Sustainable Development (CETASD), Faculty of Chemistry, VNU University of Science, Vietnam National University, Hanoi, 334 Nguyen Trai, Thanh Xuan, Hanoi 100000, Vietnam

Email: [vietph@vnu.edu.vn](mailto:vietph@vnu.edu.vn)

### **Supplementary Information**

- Text S1 to S3
- Table S1 to S6
- Figure S1

## Supplementary Text

### Text S1. Ranking procedure used in module 2

Selection of the optimal pipeline was based on a composite multi-criteria ranking scheme rather than on any single performance metric. For each pipeline  $p$ , analyte  $c$ , metric  $m$ , and outer split  $s$ , a rank  $r_{pcms}$  was assigned. For BAcc, F1 score, and AUC, higher values were considered preferable, whereas for RMSE-based metrics, lower values were considered preferable. The composite rank for each pipeline–analyte–split combination was calculated as:

$$R_{pcs} = \frac{1}{M} \sum_{m=1}^M r_{pcms}$$

where  $M$  denotes the number of metrics included in the ranking procedure. The overall rank of pipeline  $p$  was then obtained by averaging  $R_{pcs}$  across all analytes and outer splits:

$$GlobalRank_p = \frac{1}{CS} \sum_{c=1}^C \sum_{s=1}^S R_{pcs}$$

where  $C = 3$  is the number of analytes and  $S$  is the total number of outer evaluations. Lower values of  $GlobalRank_p$  indicated better overall pipeline performance.

Pipeline stability was quantified as the standard deviation of  $R_{pcs}$  across all analytes and outer splits:

$$Stability_p = SD(R_{pcs})$$

Lower  $Stability_p$  values indicated lower sensitivity to data partitioning.

### Text S2. Ranking procedure used in step 3.1 of module 3

Classifier performance was evaluated on the outer test folds using balanced accuracy (BAcc) and F1 score, with AUC used as a supplementary descriptor. Model selection for each analyte–region combination was based on a weighted composite rank:

$$Rank_{total} = 0.7 Rank_{BAcc} + 0.3 Rank_{F1}$$

A greater weight was assigned to BAcc because, within the hurdle-model framework, balanced performance on both the positive and negative classes was required. The F1 score was retained to ensure adequate performance on the positive class, since false-negative predictions would completely disable the downstream regression branch.

### Text S3. Ranking procedure used in step 3.2 of module 3

To identify the optimal regression model within the hurdle-model framework, each regressor configuration was evaluated using three metrics:  $RMSE_{pos}$ ,  $RMSE_{pos,TP}$ , and  $RMSE_0$ . These metrics were converted into ranks in ascending order, such that lower RMSE values corresponded to better ranks, and were combined into a single composite score as follows:

$$Rank_{total} = 0.6 Rank_{RMSE_{pos}} + 0.25 Rank_{RMSE_{pos,TP}} + 0.15 Rank_{RMSE_0}$$

The greater weight assigned to  $RMSE_{pos}$  was intended to emphasize overall predictive performance under practical conditions, whereas  $RMSE_{pos,TP}$  and  $RMSE_0$  were included to capture intrinsic regression accuracy and control error on the negative class, respectively. The composite rank was calculated separately for each analyte and then averaged across analytes to determine the globally optimal regressor configuration. In

addition, configuration stability was assessed from the standard deviation of  $RMSE_{pos}$  across cross-validation iterations, such that models with more consistent performance were preferentially selected.

## Supplementary Tables

**Table S1. Designed API contents and HPLC-DAD measured actual contents of the 103 pellets in the calibration set**

| Pellet ID | Designed content (%w/w) |    |    | HPLC-DAD measured content (%w/w) |       |      |
|-----------|-------------------------|----|----|----------------------------------|-------|------|
|           | LD                      | BZ | CD | LD                               | BZ    | CD   |
| 1         | 20                      | 5  | 0  | 18.51                            | 5.09  | 0    |
| 2         | 20                      | 10 | 0  | 19.21                            | 11.03 | 0    |
| 3         | 20                      | 15 | 0  | 19.31                            | 17.42 | 0    |
| 4         | 20                      | 20 | 0  | 19.42                            | 23.14 | 0    |
| 5         | 40                      | 5  | 0  | 40.53                            | 5.52  | 0    |
| 6         | 40                      | 10 | 0  | 41.78                            | 10.57 | 0    |
| 7         | 40                      | 15 | 0  | 39.7                             | 16.96 | 0    |
| 8         | 40                      | 20 | 0  | 32.92                            | 20.76 | 0    |
| 9         | 60                      | 5  | 0  | 60.49                            | 6.04  | 0    |
| 10        | 60                      | 10 | 0  | 59.04                            | 13.64 | 0    |
| 11        | 60                      | 15 | 0  | 70.37                            | 17.67 | 0    |
| 12        | 60                      | 20 | 0  | 59.84                            | 21.44 | 0    |
| 13        | 80                      | 5  | 0  | 72.41                            | 4.54  | 0    |
| 14        | 80                      | 10 | 0  | 74.81                            | 9.33  | 0    |
| 15        | 80                      | 15 | 0  | 71.74                            | 13.62 | 0    |
| 16        | 80                      | 20 | 0  | 74.8                             | 19.49 | 0    |
| 17        | 20                      | 0  | 2  | 18.85                            | 0     | 1.86 |
| 18        | 20                      | 0  | 4  | 18.76                            | 0     | 3.57 |
| 19        | 20                      | 0  | 6  | 18.89                            | 0     | 5.33 |
| 20        | 20                      | 0  | 8  | 19.37                            | 0     | 7.2  |
| 21        | 40                      | 0  | 2  | 43.01                            | 0     | 2.57 |
| 22        | 40                      | 0  | 4  | 38.91                            | 0     | 3.38 |
| 23        | 40                      | 0  | 6  | 40.69                            | 0     | 6.41 |
| 24        | 40                      | 0  | 8  | 42.84                            | 0     | 7.38 |
| 25        | 60                      | 0  | 2  | 60.3                             | 0     | 2.87 |
| 26        | 60                      | 0  | 4  | 41.6                             | 0     | 2.49 |
| 27        | 60                      | 0  | 6  | 52.74                            | 0     | 5.75 |
| 28        | 60                      | 0  | 8  | 58.21                            | 0     | 7.18 |
| 29        | 80                      | 0  | 2  | 72.55                            | 0     | 2.43 |
| 30        | 80                      | 0  | 4  | 79.02                            | 0     | 4.43 |
| 31        | 80                      | 0  | 6  | 72.77                            | 0     | 5.85 |
| 32        | 80                      | 0  | 8  | 56.73                            | 0     | 5.74 |
| 33        | 0                       | 5  | 0  | 0                                | 5.44  | 0    |
| 34        | 0                       | 10 | 0  | 0                                | 12.99 | 0    |
| 35        | 0                       | 15 | 0  | 0                                | 19.36 | 0    |
| 36        | 0                       | 20 | 0  | 0                                | 19.89 | 0    |
| 37        | 0                       | 0  | 2  | 0                                | 0     | 2.3  |
| 38        | 0                       | 0  | 4  | 0                                | 0     | 3.45 |
| 39        | 0                       | 0  | 6  | 0                                | 0     | 5.03 |

|    |    |       |     |       |       |       |
|----|----|-------|-----|-------|-------|-------|
| 40 | 0  | 0     | 8   | 0     | 0     | 6.59  |
| 41 | 0  | 0     | 0   | 0     | 0     | 0     |
| 42 | 0  | 0     | 2.5 | 0     | 0     | 1.97  |
| 43 | 0  | 0     | 5   | 0     | 0     | 4.65  |
| 44 | 0  | 0     | 7.5 | 0     | 0     | 6.48  |
| 45 | 0  | 6.25  | 0   | 0     | 7.55  | 0     |
| 46 | 0  | 6.25  | 2.5 | 0     | 6.42  | 4.42  |
| 47 | 0  | 6.25  | 5   | 0     | 6.64  | 6.19  |
| 48 | 0  | 6.25  | 7.5 | 0     | 6.15  | 8.29  |
| 49 | 0  | 12.5  | 0   | 0     | 12.78 | 0     |
| 50 | 0  | 12.5  | 2.5 | 0     | 12.3  | 5.64  |
| 51 | 0  | 12.5  | 5   | 0     | 11.45 | 6.86  |
| 52 | 0  | 12.5  | 7.5 | 0     | 12.02 | 9.14  |
| 53 | 0  | 18.75 | 0   | 0     | 19.48 | 0     |
| 54 | 0  | 18.75 | 2.5 | 0     | 17.69 | 4.69  |
| 55 | 0  | 18.75 | 5   | 0     | 17.98 | 7.37  |
| 56 | 0  | 18.75 | 7.5 | 0     | 16.02 | 8.45  |
| 57 | 25 | 0     | 0   | 24.15 | 0     | 0     |
| 58 | 25 | 0     | 2.5 | 24.85 | 0     | 2.41  |
| 59 | 25 | 0     | 5   | 25.38 | 0     | 3.32  |
| 60 | 25 | 0     | 7.5 | 22.8  | 0     | 6.49  |
| 61 | 25 | 6.25  | 0   | 23.26 | 6.91  | 0     |
| 62 | 25 | 6.25  | 2.5 | 23.69 | 6.23  | 3.71  |
| 63 | 25 | 6.25  | 5   | 21.86 | 5.72  | 5.52  |
| 64 | 25 | 6.25  | 7.5 | 22.97 | 6.13  | 0     |
| 65 | 25 | 12.5  | 0   | 21.58 | 12.51 | 7.34  |
| 66 | 25 | 12.5  | 2.5 | 23.39 | 12.8  | 5.24  |
| 67 | 25 | 12.5  | 5   | 23.67 | 11.78 | 7.4   |
| 68 | 25 | 12.5  | 7.5 | 24.67 | 12.87 | 9.79  |
| 69 | 25 | 18.75 | 0   | 19.17 | 16.22 | 0     |
| 70 | 25 | 18.75 | 2.5 | 18.64 | 14.85 | 5.15  |
| 71 | 25 | 18.75 | 5   | 23.28 | 17.88 | 9     |
| 72 | 25 | 18.75 | 7.5 | 21.78 | 17.91 | 11.18 |
| 73 | 50 | 0     | 0   | 47.96 | 0     | 0     |
| 74 | 50 | 0     | 2.5 | 45.7  | 0     | 2.44  |
| 75 | 50 | 0     | 5   | 48.91 | 0     | 4.73  |
| 76 | 50 | 0     | 7.5 | 46.52 | 0     | 6.65  |
| 77 | 50 | 6.25  | 0   | 49.94 | 5.86  | 0     |
| 78 | 50 | 6.25  | 2.5 | 49.17 | 6.67  | 3.24  |
| 79 | 50 | 6.25  | 5   | 49.8  | 5.52  | 5.14  |
| 80 | 50 | 6.25  | 7.5 | 46.99 | 5.42  | 7.09  |
| 81 | 50 | 12.5  | 0   | 44.46 | 12.43 | 0     |
| 82 | 50 | 12.5  | 2.5 | 49.33 | 12.07 | 5.85  |
| 83 | 50 | 12.5  | 5   | 47.91 | 11.88 | 8.2   |
| 84 | 50 | 12.5  | 7.5 | 48.06 | 11.19 | 9.64  |
| 85 | 50 | 18.75 | 0   | 46.84 | 18.63 | 0     |
| 86 | 50 | 18.75 | 2.5 | 49.61 | 17.03 | 6.25  |

|     |    |       |     |       |       |       |
|-----|----|-------|-----|-------|-------|-------|
| 87  | 50 | 18.75 | 5   | 49.68 | 17.67 | 9.1   |
| 88  | 50 | 18.75 | 7.5 | 48.13 | 14.99 | 10.52 |
| 89  | 75 | 0     | 0   | 69.77 | 0     | 0     |
| 90  | 75 | 0     | 2.5 | 68.37 | 0     | 2.45  |
| 91  | 75 | 0     | 5   | 67.75 | 0     | 4.59  |
| 92  | 75 | 0     | 7.5 | 67.74 | 0     | 6.72  |
| 93  | 75 | 6.25  | 0   | 66.36 | 6.94  | 0     |
| 94  | 75 | 6.25  | 2.5 | 73.87 | 7.14  | 3.09  |
| 95  | 75 | 6.25  | 5   | 70.8  | 5.24  | 4.49  |
| 96  | 75 | 6.25  | 7.5 | 72.41 | 5.21  | 7.24  |
| 97  | 75 | 12.5  | 0   | 66.29 | 11.02 | 0     |
| 98  | 75 | 12.5  | 2.5 | 68.76 | 11.27 | 3.88  |
| 99  | 75 | 12.5  | 5   | 71.38 | 13.31 | 7.66  |
| 100 | 75 | 12.5  | 7.5 | 68.24 | 12.16 | 10.34 |
| 101 | 75 | 18.75 | 0   | 71.18 | 19.8  | 0     |
| 102 | 75 | 18.75 | 2.5 | 69.14 | 16.31 | 6.92  |
| 103 | 75 | 18.75 | 5   | 66.02 | 17.41 | 7.88  |

**Table S2. Range of hyperparameters used as GridSearchCV in module 2**

| Classifier/Regressor | Hyperparameters | Range                                                                                     |
|----------------------|-----------------|-------------------------------------------------------------------------------------------|
| Logistic regression  | C               | 0.01, 0.1, 1, 10, 100, 1000                                                               |
| PLS                  | n_components    | 1, 2, 3, 4, 5, 6, 7, 8, 9, 10, 11, 12, 13, 14, 15, 16, 17, 18, 19, 20, 21, 22, 23, 24, 25 |

*scoring = 'balanced\_accuracy' for classifier, and 'neg\_root\_mean\_squared\_error' for regressor*

**Table S3. Range of hyperparameters used for RandomizedSearchCV in step 3.1 and step 3.3 of module 3**

| Classifier          | Hyperparameters  | Range                        |
|---------------------|------------------|------------------------------|
| Logistic regression | C                | loguniform(1e-3, 1e3)        |
| SVC                 | C                | loguniform(1e-2, 1e3)        |
|                     | gamma            | loguniform(1e-4, 1e0)        |
| RF                  | n_estimators     | randint(300, 1500),          |
|                     | max_depth        | None, 8, 12, 18, 25, 35      |
|                     | min_samples_leaf | randint(1, 6),               |
|                     | max_features     | sqrt', 'log2', 0.3, 0.5, 0.8 |

*scoring = 'balanced\_accuracy', n\_iter = 100 and 300 for the step 3.1 and 3.3, respectively*

**Table S4. Range of hyperparameters used as GridSearchCV for PLS/PCR and RandomizedSearchCV for SVR/RF in step 3.2 and step 3.3 of module 3**

| Classifier | Hyperparameters  | Range                                                                                     |
|------------|------------------|-------------------------------------------------------------------------------------------|
| PLS        | n_components     | 1, 2, 3, 4, 5, 6, 7, 8, 9, 10, 11, 12, 13, 14, 15, 16, 17, 18, 19, 20, 21, 22, 23, 24, 25 |
| PCR        | n_components     | 1, 2, 3, 4, 5, 6, 7, 8, 9, 10, 11, 12, 13, 14, 15, 16, 17, 18, 19, 20, 21, 22, 23, 24, 25 |
| SVR        | C                | loguniform(1e-2, 1e3)                                                                     |
|            | gamma            | loguniform(1e-4, 1e0)                                                                     |
|            | Epsilon          | loguniform(1e-3, 1e0)                                                                     |
| RF         | n_estimators     | randint(300, 1500),                                                                       |
|            | max_depth        | None, 8, 12, 18, 25, 35                                                                   |
|            | min_samples_leaf | randint(1, 6),                                                                            |
|            | max_features     | 'sqrt', 'log2', 0.3, 0.5, 0.8                                                             |

*scoring = 'neg\_root\_mean\_squared\_error', n\_iter = 100 and 300 for the step 3.2 and 3.3, respectively*

**Table S5. Rank and stability of 16 combinations of preprocessing pipeline and spectral type in module 2**

| Spectral type | Preprocessing pipeline     | Global rank | Stability |
|---------------|----------------------------|-------------|-----------|
| mean          | SG first derivative + SNV  | 3.80        | 1.25      |
| mean          | RAW + MSC                  | 4.55        | 1.17      |
| mean          | SG smoothing + MSC         | 5.18        | 1.19      |
| mean          | RAW + SNV                  | 5.73        | 1.18      |
| mean          | SG second derivative + SNV | 7.63        | 1.22      |
| mean          | SG first derivative + MSC  | 8.00        | 1.18      |
| median        | RAW + MSC                  | 8.00        | 1.51      |
| median        | SG smoothing + MSC         | 8.20        | 1.48      |
| mean          | SG smoothing + SNV         | 8.60        | 2.46      |
| median        | SG first derivative + MSC  | 10.17       | 0.97      |

|               |                            |       |      |
|---------------|----------------------------|-------|------|
| <b>mean</b>   | SG second derivative + MSC | 10.17 | 1.48 |
| <b>median</b> | RAW + SNV                  | 10.23 | 1.35 |
| <b>median</b> | SG smoothing + SNV         | 10.80 | 1.43 |
| <b>median</b> | SG second derivative + MSC | 11.07 | 2.10 |
| <b>median</b> | SG second derivative + SNV | 11.83 | 1.42 |
| <b>median</b> | SG first derivative + SNV  | 12.03 | 1.35 |

**Table S6. The ordered rankings of regression profiles in the step 3.2 of module 3**

| <b>No.</b> | <b>Spectral region</b> | <b>Mode</b> | <b>Regressor</b> | <b>Total rank</b> | <b>Stability</b> |
|------------|------------------------|-------------|------------------|-------------------|------------------|
| <b>1</b>   | half                   | single      | RF               | 6.40              | 1.25             |
| <b>2</b>   | fingerprint            | single      | RF               | 7.40              | 1.17             |
| <b>3</b>   | half                   | single      | PCR              | 8.45              | 0.93             |
| <b>4</b>   | full                   | single      | RF               | 8.63              | 0.97             |
| <b>5</b>   | full                   | multi       | RF_multi         | 9.43              | 1.19             |
| <b>6</b>   | full                   | single      | PCR              | 9.72              | 0.60             |
| <b>7</b>   | fingerprint            | single      | PLS              | 9.95              | 1.10             |
| <b>8</b>   | half                   | multi       | RF_multi         | 10.23             | 1.30             |
| <b>9</b>   | fingerprint            | single      | PCR              | 10.37             | 0.90             |
| <b>10</b>  | half                   | single      | PLS              | 10.97             | 1.11             |
| <b>11</b>  | fingerprint            | multi       | RF_multi         | 11.60             | 1.09             |
| <b>12</b>  | half                   | multi       | PCR_multi        | 12.43             | 0.89             |
| <b>13</b>  | fingerprint            | multi       | PLS2             | 12.80             | 1.03             |
| <b>14</b>  | full                   | multi       | PCR_multi        | 12.87             | 0.98             |
| <b>15</b>  | fingerprint            | single      | SVR              | 12.98             | 1.13             |
| <b>16</b>  | full                   | single      | PLS              | 13.17             | 0.75             |
| <b>17</b>  | fingerprint            | multi       | PCR_multi        | 13.30             | 1.04             |

|    |             |        |           |       |      |
|----|-------------|--------|-----------|-------|------|
| 18 | half        | multi  | SVR_multi | 15.80 | 1.30 |
| 19 | fingerprint | multi  | SVR_multi | 16.10 | 1.09 |
| 20 | full        | multi  | SVR_multi | 16.30 | 1.15 |
| 21 | full        | single | SVR       | 16.40 | 1.09 |
| 22 | half        | single | SVR       | 16.73 | 1.27 |
| 23 | half        | multi  | PLS2      | 18.40 | 0.75 |
| 24 | full        | multi  | PLS2      | 19.57 | 0.87 |

**Table S7. Recovery of LD, BZ and CD from synthetic excipient pellets at three spiking levels (n = 3 for low and high levels, n = 6 for medium level)**

| Synthetic mixture type | API | Spiking level | Added content (% w/w) | HPLC-DAD found (% w/w) | ATR-FTIR found (% w/w) | Recovery (%) |
|------------------------|-----|---------------|-----------------------|------------------------|------------------------|--------------|
| LD+CD                  | LD  | Low           | 40                    | 34.34 ± 4.93           | 35.48 ± 3.21           | 103.9 ± 7.0  |
| LD+CD                  | LD  | Medium        | 50                    | 48.02 ± 10.18          | 48.40 ± 11.71          | 101.1 ± 12.7 |
| LD+CD                  | LD  | High          | 60                    | 61.12 ± 2.74           | 64.04 ± 6.89           | 104.6 ± 7.0  |
| LD+CD                  | CD  | Low           | 4                     | 4.17 ± 0.98            | 4.79 ± 0.82            | 116.3 ± 11.6 |
| LD+CD                  | CD  | Medium        | 5                     | 4.88 ± 0.99            | 4.78 ± 0.93            | 98.7 ± 10.8  |
| LD+CD                  | CD  | High          | 6                     | 6.31 ± 0.22            | 5.90 ± 0.57            | 93.6 ± 9.6   |
| LD+BZ                  | LD  | Low           | 28.8                  | 28.37 ± 4.46           | 29.91 ± 7.92           | 104.3 ± 11.2 |
| LD+BZ                  | LD  | Medium        | 36                    | 35.69 ± 5.92           | 33.73 ± 8.03           | 93.9 ± 11.4  |
| LD+BZ                  | LD  | High          | 43.2                  | 41.95 ± 2.11           | 40.11 ± 4.67           | 95.5 ± 7.4   |
| LD+BZ                  | BZ  | Low           | 7.2                   | 6.12 ± 0.22            | 6.44 ± 0.20            | 105.2 ± 5.9  |
| LD+BZ                  | BZ  | Medium        | 9                     | 9.28 ± 2.09            | 9.66 ± 1.85            | 105.3 ± 10.8 |
| LD+BZ                  | BZ  | High          | 10.8                  | 10.67 ± 0.59           | 10.11 ± 0.98           | 94.8 ± 9.9   |

**Table S8. Detailed AGREE scoring parameters for ATR-FTIR/hurdling model**

| No. | Criteria                                                                                                                         | Condition                                                                                              |
|-----|----------------------------------------------------------------------------------------------------------------------------------|--------------------------------------------------------------------------------------------------------|
| 1   | Direct analytical techniques should be applied to avoid sample treatment                                                         | In-field sampling and direct analysis                                                                  |
| 2   | Minimal sample size and minimal number of samples are goals                                                                      | 1.12 g (= 30 mg * 112 total samples / 3 samples)                                                       |
| 3   | In situ measurements should be performed                                                                                         | At-line                                                                                                |
| 4   | Integration of analytical processes and operations saves energy and reduces the use of reagents                                  | 3 or fewer                                                                                             |
| 5   | Automated and miniaturized methods should be selected                                                                            | Degree of automation: Semi-automatic<br>Sample preparation: none or miniaturized                       |
| 6   | Derivatization should be avoided                                                                                                 | None                                                                                                   |
| 7   | Generation of a large volume of analytical waste should be avoided, and proper management of analytical waste should be provided | 1.12 g                                                                                                 |
| 8   | Multi-analyte or multi-parameter methods are preferred versus methods using one analyte at a time                                | Number of analytes determined in a single run: 3<br>Sample throughput (samples analysed per hour): 0.4 |
| 9   | The use of energy should be minimized                                                                                            | FTIR                                                                                                   |
| 10  | Reagents obtained from renewable sources should be preferred                                                                     | No reagents                                                                                            |
| 11  | Toxic reagents should be eliminated or replaced                                                                                  | Does the method involve the use of toxic reagents or solvents: No                                      |
| 12  | The safety of the operator should be increased                                                                                   | None                                                                                                   |

## Supplementary Figure

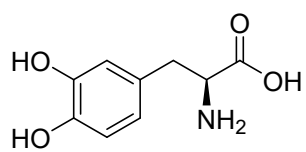

levodopa

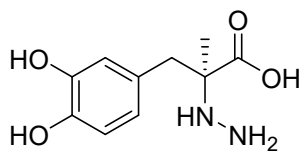

carbidopa

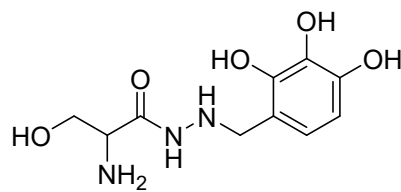

benserazide

Figure S1. The chemical structures of LD, CD, and BZ.
